# Supplementary material for: Autoinsertion of soluble oligomers of Alzheimer's Aβ(1–42) peptide into cholesterol-containing membranes is accompanied by relocation of the sterol towards the bilayer surface
Source: PubMed Central journal article supplement (PMC1657013; doi:10.1186/1472-6807-6-21), 2006-10-19
Supplement: 1472-6807-6-21-S2.pdf [file 1472-6807-6-21-S2.pdf]

Mr (K)

samples

250  
150  
100  
75  
50  
37  
25  
20  
15  
10  
5.7

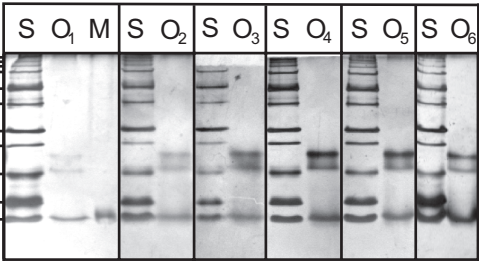

↑  
↑  
↑
